# Supplementary material for: MapperPlus: Agnostic clustering of high-dimension data for precision medicine
Source: PubMed Central journal article supplement (PMC10411786; doi:10.1371/journal.pdig.0000307), 2023-08-09
Supplement: pdig.0000307.s001.pdf [file pdig.0000307.s001.pdf]

# 1 Supplementary Material

## 2 Modularity

3 The modularity score, as defined by Newman ([1]), is the most widely accepted quantitative  
4 measure of community structure in networks. It is defined as

$$M = \sum_i (e_{ii} - a_i^2), \quad (1)$$

5 where  $e_{ii}$  is the fraction of edges that fall within community  $i$  and  $a_i$  is the fraction of all  
6 ends of edges that are attached to vertices in community  $i$ . This measure ranges between  
7 -1 and 1, with higher values indicating a stronger community structure. A large modularity  
8 score suggests that the identified communities of the network are well separated, while a  
9 score of zero indicates that the communities are randomly selected.

## 10 MapperPlus details

11 In Step 3, a clustering algorithm is used to cluster the inverse image  $f^{-1}(C_n)$  of each hy-  
12 percube. We store the number of observations within each cluster in the matrix  $M$  where  
13  $M_{ij} = |i \in P_j|$  where  $\mathcal{P} = \{P_j\}$  is the set of all clusters generated by Mapper.

14 In Step 4 of the process, the Mapper graph  $G_M$  is generated using  $r^m$  overlapping hy-  
15 percubes  $\mathcal{C} = \{C_j\}$  where  $m$  is the dimension of the lensed space. We store the number of  
16 observations  $i$  (out of a total of  $N$ ) whose image under the lens  $f$  falls into each hypercube  
17 in the matrix  $H_{N \times r^n}$  where  $H_{in} = |i \in C_n|$ .

18 The adjacency matrix of the Mapper graph  $G_M$  is defined as  $A_M = M^T M$ . The edge  
19 weights  $A_{M_{ij}}$  indicates the number of observations shared between clusters  $P_i$  and  $P_j$ . Note  
20 that by construction, nodes in  $A_M$  are connected to themselves.

The adjacency matrix for the graph of instances  $G$  is defined as

$$(A_{I_{ij}}) = (MM^T)_{ij} + \sum_{k \in \mathcal{C}} \frac{H_{ik}H_{jk}}{\sum_a H_{ak}}.$$

21 The term  $(MM^T)_{ij}$  denotes the number of nodes in the Mapper graph that contain both ob-  
22 servations  $i$  and  $j$ . The second term sums over all hypercubes that contain both observations  
23  $i$  and  $j$  and is normalized by the number of number of observations in the hypercube.

## 24 **Stem Cell Transplant Data Processing**

25 The dataset contained 77 missing values. Given that these datapoints comprised a small  
26 fraction of the overall dataset (roughly 1.1% of the observations), these points were replaced  
27 with zeroes for the MapperPlus analysis. This is because, given the choice of lens, the zero  
28 value would not have a significant effect on output. However, for the statistical testing of  
29 the resultant clusters, all missing values were replaced with the mean value of the variable  
30 to prevent skewing the results.

31 The dataset also contained features with missing labelling in the data dictionary. For  
32 the sake of completeness, these features were still included in the clustering but not in the  
33 summary statistics.

34 The dataset was normalized (convert to  $z$ -scores) prior to analysis.

## 35 Numerical Validation MapperPlus Inputs

36 For all datasets, the metric was Euclidean distance, the lens was the first 2 PCA components,  
37 and the clusterer was  $k$ -means with 2 clusters. The choice of clusterer was a practical  
38 consideration, as the agnostic techniques available generated large numbers of clusters each  
39 containing very few observations. We selected 2 clusters for  $k$ -means to provide the minimal  
40 separation within each hypercube.

41 For the Wine dataset, the resolution was 7 and gain was 0.7. For the breast cancer  
42 dataset, the resolution was 4 and the gain was 0.7. For the iris dataset, the resolution was 4  
43 and the gain was 0.8. For the rice dataset, the resolution was 4 and the gain was 0.7. These  
44 resolutions were selected by manual tuning.

## 45 Using MapperPlus to predict survival in pediatric transplant pa- 46 tients: MapperPlus inputs

47 For this analysis, the Euclidean metric was used. We applied a 2-dimensional lens consisting  
48 of an Isolation Forest score and the first PCA component. For the choice of clusterer, we

49 applied  $k$ -means with 2 clusters. This choice of clusterer is unusual in that it requires  
50 the specification of the number of clusters. We chose 2 clusters because, in the absence of  
51 knowing how many clusters may occur, this provides a minimal amount of separation. While  
52 agnostic clusterers were available, these methods often yielded arbitrarily large numbers of  
53 clusters with too few observations to analyze statistically.

## 54 **Cluster Validity**

55 For our analysis, we determined that an average NMI score of 0.6 was appropriate. We  
56 selected resolution and gain pairs that surpassed this NMI score. It should be noted that we  
57 are not selecting the highest possible NMI score. Often, very high NMI scores are indicative  
58 of a trivial result. For instance, this can occur at low resolution and high gain, when the  
59 majority of observations fall in the overlap between a few hypercubes. In such a scenario,  
60 the clusterer is no longer performing a partial clustering, but rather is affecting almost every  
61 observation. Then, the stability of the result is completely driven by the clusterer. This is  
62 no longer a topological clustering based on Mapper, but a clustering driven by the choice

63 of clusterer. As such, maximizing NMI is not an appropriate approach, especially when  
64 dealing with extreme resolution and gain values. Rather, it is preferred to identify a range  
65 of resolution and gain pairs that meet the NMI threshold and perform a manual tuning from  
66 that point on.

## 67 **References**

- 68 [1] J NME. Fast algorithm for detecting community structure in networks. Phys Rev E.  
69 2004;69:066133. doi:10.1103/PhysRevE.69.066133.
